2 **Title:** Stronger connectivity of the resident gut microbiome lends resistance to invading bacteria

4 **Authors:** Cristina M. Herren<sup>1, 2, 3\*</sup>, Michael Baym<sup>3, 4</sup>

<sup>1</sup>Harvard Data Science Initiative, Harvard University, Cambridge, Massachusetts, USA

6 <sup>2</sup>Freshwater and Marine Sciences Program, University of Wisconsin - Madison, Madison, Wisconsin,  
USA

8 <sup>3</sup>Department of Biomedical Informatics, Harvard Medical School, Boston, Massachusetts, USA

<sup>4</sup>Laboratory of Systems Pharmacology, Harvard Medical School, Boston, Massachusetts, USA

10 \* To whom correspondence should be addressed: [cristina\\_herren@hms.harvard.edu](mailto:cristina_herren@hms.harvard.edu)

310 Countway Medical Library, 10 Shattuck St, Boston MA 02115

12

12 **Abstract:** Bacterial infection in the gut is often due to successful invasion of the host microbiome by an  
introduced pathogen. Ecological theory indicates that resident community members and their interactions  
14 should be strong determinants of whether an invading taxon can persist in a community. In the context of  
the gut microbiome, this suggests colonization resistance against newly introduced bacteria should  
16 depend on the instantaneous bacterial community composition within the gut and interactions between  
these constituent members. Here we develop a mathematical model of how metabolite-dependent biotic  
18 interactions between resident bacteria mediate invasion, and find that stronger biotic connectivity from  
metabolite cross-feeding and competition increases colonization resistance. We then introduce a statistical  
20 method for identifying invasive taxa in the human gut, and show empirically that greater connectivity of  
the resident gut microbiome is related to increased resistance to invading bacteria. Finally, we examined  
22 patient outcomes after fecal microbiota transplant (FMT) for recurring *Clostridium difficile* infection.  
Patients with lower connectivity of the gut microbiome after treatment were more likely to relapse,  
24 experiencing a later infection. Thus, simulation models and data from human subjects support the  
hypothesis that stronger interactions between bacteria in the gut repel invaders. These results demonstrate  
26 how ecological invasion theory can be applied to the gut microbiome, which might inform targeted  
microbiome manipulations and interventions. More broadly, this study provides evidence that low  
28 connectivity in gut microbial communities is a hallmark of community instability and susceptibility to  
invasion.

30

## 30 **Introduction**

Human infection is often due to the successful invasion of harmful bacteria in the host-associated  
32 microbiome (Nizet et al. 2001, Bel et al. 2017). Although the human body is frequently exposed to  
harmful invaders (for example, pathogens on food [Berger et al. 2010] or household surfaces [Flores et al.  
34 2013]), few introductions result in disease. However, pathogens comprise only a small subset of all  
potentially invasive bacteria within the human gut microbiome (David et al. 2014). The resident  
36 microbiome plays a substantial role in mediating resistance to invaders, but the mechanisms of action are  
only partially understood (Baumler and Sperandio 2016).

38 Ecological invasions progress through distinct stages, beginning with transport and population  
expansion, and culminating in their impact on ecosystems (Sakai et al. 2001). These same stages occur  
40 when newly introduced bacteria colonize the human microbiome (Bosch et al. 2013, Kc et al. 2017). Most  
ecological invasions are unsuccessful (Williamson 2006). This is also observed in invasions in the human  
42 microbiome; although humans are constantly exposed to novel bacteria, the microbiomes of different  
body sites retain distinct compositional profiles and display stability over time (Caporaso et al. 2011, Oh  
44 et al. 2016). Thus, most bacterial populations introduced into the human-associated microbiome also fail  
to establish.

46 Ecological studies have demonstrated that the success of invading taxa depends strongly on the  
biotic interactions within the resident community (Lodge 1993, Fey and Herren 2014). This is also  
48 observed in the context of the gut microbiome, where interactions take the form of exchanging and  
competing for metabolites (Kinnunen et al. 2016, Mullineaux-Sanders et al. 2018). For example, a recent  
50 study demonstrated that an alteration to the resident gut microbial community allowed invasive  
*Salmonella* to thrive on a newly abundant metabolite (Gillis et al. 2017). Thus, the resident gut  
52 community was indicative of resource availability, which mediated colonization resistance against  
*Salmonella*. Despite the importance of metabolite-mediated bacterial interactions, few models of  
54 microbial community invasion have explicitly included metabolites.

In this study, we investigate the role of the resident gut microbiome community in mediating  
56 resistance to invasion. First, we developed a computational model to study how metabolite cross-feeding  
and competition mediate success of an invading microbe. We then introduce a novel statistical method to  
58 identify invasive taxa in empirical microbial communities, and use this approach to study the invasive  
bacteria in three long-term gut time series. The gut microbiome is an ideal system to test ecological  
60 invasion theory, because the gut is at constant risk of invasion from consumed bacteria and from  
opportunistically invasive commensal bacteria (Benjamin et al. 2013). Finally, we evaluated whether gut  
62 connectivity could predict susceptibility to invasion by the pathogen *Clostridium difficile* in patients who  
received fecal microbiota transplant (FMT) therapy. We chose *C. difficile* as a test case because it is a  
64 well-studied bacterial pathogen whose colonization depends on the resident gut microbiome (Schubert et  
al. 2015).

66

## Methods

### 68 *Simulation Model*

We constructed a mathematical model consisting of resident taxa, an invading taxon, and the  
70 metabolites required for cell reproduction. Taxa interact through competition for metabolites in the  
environment and through cross-feeding of metabolites. Of all possible metabolites in the model ( $m$ ), each  
72 taxon required a randomly assigned unique subset of  $n$  metabolites for growth, giving each a distinct  
niche. Each taxon also excreted a non-overlapping subset of  $q$  metabolites. Excretion profiles were not  
74 necessarily unique. Cross-feeding, defined as direct flow of metabolites from one taxon to another, was  
possible if one taxon excreted a certain metabolite required by a different taxon. Other parameters in the  
76 simulation model included the proportion of possible metabolite exchanges due to cross-feeding that are  
realized ( $p$ ), a competition coefficient ( $c$ ), variability in competition coefficients among taxa ( $v$ ), an input  
78 rate for metabolites ( $i$ ), a flushing rate for metabolites and cells ( $f$ ), metabolite input rates ( $i$ ) and the  
number of taxa present in the community at the start ( $x$ ). During each run, all possible combinations of  $m$   
80 choose  $n$  metabolite requirement profiles were generated, and a random subset of  $x$  requirement and

excretion profiles were assigned to the taxa. One of the  $x$  taxa had metabolic requirements matching the  
82 input metabolites. From the requirement and excretion profiles, every possible one-way metabolite flow  
was identified. A random subset of these possible exchanges were selected as realized cross-feeding  
84 relationships. Competition coefficients for each taxon were drawn from a normal distribution with mean  $c$   
and a standard deviation of  $v$ .

86 In each time step, metabolites enter the environmental pool (Fig. 1a). Taxa then compete for these  
metabolites, with uptake rates governed by their competition coefficients, which quantify scavenging  
88 efficiency. Demand for each metabolite is calculated as the number of individuals lacking the metabolite  
multiplied by their respective competition coefficients. If total demand is greater than the available  
90 metabolites, metabolites are allocated among taxa in proportion to the demand of each taxon. We assume  
for simplicity that metabolite uptake amongst individuals in a population is arranged to maximize  
92 biomass production (Klitgord and Segrè 2011). Individuals that obtain one unit of each necessary  
metabolite reproduce and excrete their given metabolites. If these individuals were from taxa participating  
94 in cross-feeding, the excreted metabolites were preferentially available to the recipient taxon before  
entering the environmental pool. If the growing taxon had more than one exchange (i.e. more than one  
96 cross-feeder), an equal amount of metabolites were made available to each recipient taxon. Finally, a  
proportion  $f$  of individuals and environmental metabolites were flushed from the system.

98 The invader was introduced after the community of resident taxa equilibrated (Fig 1b). The  
invader had a fixed competition value (in these simulations, 0.9), and participated in no cross-feeding. We  
100 reasoned that cross-feeding exchanges often need time to develop (e.g. time for proper spatial  
configuration [Pathak et al. 2012], construction of nanotubes [Pande et al. 2015], or within-host  
102 coevolution [Foster et al. 2017]), and that an invading taxon would therefore have no preexisting cross-  
feeding relationships. The run was completed once the model reached equilibrium after the invader was  
104 introduced. The outcomes recorded were persistence of the invader, standing pools of metabolites, total  
number of individuals in the community, and number of taxa persisting. We evaluated these outcomes

106 while changing the strength of biotic interactions (magnitude of competition and proportion of cross-  
feeding).

108 For simulations analyzed here, we changed the mean strength of competition ( $c$ ) between 0.4 and  
0.9 and the proportion of cross-feeding ( $p$ ) between 0 and 0.5. The standard deviation of competition  
110 values ( $v$ ) was equal to  $0.3 * c$ . Any randomly generated competition values below 0.01 were set to 0.01.  
We initialized the model with 15 taxa, 7 possible metabolites, 4 metabolites required for growth, 2  
112 metabolites excreted, and an input rate of 100 units of each of 4 metabolites. The flushing rate was 0.15  
during each time step. We used 5000 runs for each combination of competition coefficient and cross-  
114 feeding proportion. The model was determined to be at equilibrium when the maximum abundance  
change of any taxon was lower than 0.01. In a small fraction of model runs, the model resulted in a stable  
116 limit cycle (see SOM). In this case, the final values were recorded at 20,000 time steps.

### 118 *Dynamics of invasion in healthy subjects*

Next, we present a technique to identify invasive taxa in three long-term time series of the human  
120 gut microbiome. Invasive taxa are, by definition, newly introduced into communities during discrete  
events. Thus, the distribution of invasive taxa over time shows clusters of presences and absences. We  
122 quantified the degree of presence/absence clustering using an equation that calculates the probability that  
a streak of successes would be observed in a series of Bernoulli trials (Feller 1968). This method of  
124 identifying invasive taxa avoids problems associated with defining invasive taxa as those newly observed  
in a community (Kinnunen et al. 2016). In that case, the taxa classified as invasive would change based  
126 on the reference time frame.

For each taxon, we identified the longest consecutive number of days in which the taxon was  
128 present (termed a “streak”). We also calculated the fraction of total samples in which was present. From  
these two values, it is possible to calculate a p value that described the *probability that a streak equal to*  
130 *or longer than the observed streak would occur if presences and absences were randomly distributed.*  
This probability ( $q_n$ ) is given by (see Feller 1968, p. 325 for a derivation):

132

$$q_n \sim 1 - \frac{1 - px}{(r + 1 - rx)q} \cdot \frac{1}{x^{n+1}} \quad \text{Eq. 1}$$

134

136 Where  $n$  is the number of samples,  $r$  is the length of the longest streak,  $p$  is the fraction of presences  
137 across the time series,  $q = 1 - p$ , and  $x$  is the root nearest to 1 (but not  $1/p$ ) of the equation:

138

$$1 - x + q p^r x^{r+1} = 0 \quad \text{Eq. 2}$$

140

142 Using this formula, a small  $q_n$  (p value) indicates that the observed streak of persistence is longer than  
143 would be expected; this denotes a highly patchy presence/absence distribution. We classified invasive  
144 taxa as those that were significantly patchy in their distribution ( $p < 0.01$ ) and which were present in  
145 fewer than 50% of samples. We note that a cutoff of  $p < 0.05$  may not be sufficiently conservative, due to  
146 expected autocorrelation in abundances. The presence threshold was necessary because common taxa that  
147 became temporarily absent during a disturbance would also have a significantly patchy distribution.  
148 Analyses were robust to changes in these cutoffs (see SOM). To account for differences in detection  
149 limits between samples due to differing sequencing depth, we set a universal detection limit across the  
150 entire dataset (see SOM). Any values lower than this limit were set to zero.

Data for human microbiome subjects A and B were originally published in David et al. 2014.

152

153 These data are near-daily stool samples from two unrelated male subjects. We downloaded the  
154 operational taxonomic unit (OTU) tables generated from closed reference OTU picking from the Qiita  
155 portal (ID 2196). We removed samples with fewer than 10000 reads and those with otherwise low  
156 detection ability (see SOM). We removed an additional two samples from subject B (days 252 and 318)  
157 because sampling became infrequent after day 242. This resulted in 321 samples from subject A and 182

158 samples from subject B. Data from subject C were obtained from the Qiita portal (ID 11052). Again, we  
160 used the OTU tables generated from closed reference OTU picking. We removed samples with fewer than  
162 5000 reads and further removed OTUs with fewer than 10 reads across the full dataset. We subset the data  
to fecal samples from subject M03, and analyzed the longest window of consecutive fecal samples. This  
window corresponded to the 511 samples taken from 14 July 2015 to 06 February 2017. Four additional  
samples were removed due to poor detection limits.

#### 164 *Calculation of connectivity using the cohesion statistics*

We quantified connectivity of the resident gut community using cohesion statistics (Herren and  
166 McMahon 2017, <https://github.com/cherren8/Cohesion>), which give instantaneous measures of the degree  
of interconnectedness among OTUs in a microbial sample. Connectivity is hypothesized to arise from  
168 biotic interactions (see Herren and McMahon 2017 for further discussion). We operationally define  
connectivity as the true network of correlations between microbes, whereas cohesion is an estimate that  
170 quantifies connectivity.

In brief, cohesion statistics represent the average pairwise correlations between individuals in a  
172 sample, after correcting for methodological biases. There are two cohesion values for each sample,  
corresponding to connectivity from positive relationships and connectivity from negative relationships.  
174 The first step in the workflow is to calculate connectedness values for each taxon. Connectedness values  
are the average positive and negative correlation of the focal taxon with other taxa, after accounting for  
176 bias introduced by the compositional nature of the data. Cohesion values are weighted sums of the  
connectedness values multiplied by the abundances of the taxa in each sample. Taxa that are below  
178 specified abundance or persistence thresholds are not included in calculating cohesion, and are given  
connectedness values of zero.

180 For the long-term gut time series, we first-differenced the data before calculating cohesion values.  
This is a suggested step in the cohesion workflow to handle autocorrelation in abundances due to high  
182 sampling frequency (Herren and McMahon 2017). We set the persistence threshold for *inclusion* at 0.5



for the long-term gut data, which was the same cutoff for *exclusion* for defining invasive OTUs. Using the  
184 same cutoff for these two analyses meant that no taxon in the invasion analyses contributed to the  
cohesion values, thereby eliminating possible artificial relationships between the predictor and response  
186 variables in the multilevel model (see next section). We tested two possible mean abundance cutoffs of  
0.001 and 0.0001. We evaluated which cutoff yielded a better fit of the population dynamics of invasive  
188 OTUs and used that cutoff value. For subjects A and B, we used a mean abundance cutoff of 0.001, while  
for subject C we used 0.0001.

190

#### *Multilevel model analysis and model selection*

192 To evaluate whether connectivity could predict changes in taxon abundances, we built a  
hierarchical linear mixed effects model (hereafter called a “multilevel model”). We chose a multilevel  
194 model because it enables analysis of rare taxa without risk of over-parameterization. Invasive taxa are  
sufficiently rare that confident parameter estimates cannot be obtained for each taxon; instead, this type of  
196 analysis pools low-confidence estimates from each taxon to obtain a single overall estimate of how a  
predictor variable affects all invasive taxa. A template and sensitivity analysis of this type of analysis can  
198 be found in Jackson et al. 2012.

The predictors included in the multilevel models were fixed effects for the natural log-  
200 transformed abundance at time  $t$ , positive cohesion values of the communities at time  $t$ , and negative  
cohesion values of the communities at time  $t$ . The response variable was the natural log-transformed  
202 abundances of invasive taxa at time  $t + I$ . We did not include time points when the OTU was absent  
(abundance = 0) at time  $t$  or at time  $t + I$ . This was for two reasons: 1) model residuals were improved by  
204 preventing zero-inflation, and 2) it was then possible to log transform the abundances without adding an  
arbitrary positive value. Random effects were included to allow mean abundance (intercept) to vary by  
206 OTU, for the effect of positive cohesion to vary by OTU, and for the effect of prior abundance to vary by  
OTU (effectively assuming density dependence varies by OTU). We did not include a random effect to  
208 allow negative cohesion to vary by OTU, because this random effect showed high collinearity with the

random effect for positive cohesion, and negative cohesion was a weaker predictor than positive cohesion.

210 We evaluated significance of random effects by comparing AIC values of models with and without the  
terms included.

212 In order to ensure that any significant results of our analyses of invasive OTUs were not spurious  
or statistical artifacts, we analyzed paired models of OTUs that were uncommon but non-invasive. We  
214 expected that OTUs classified as non-invasive would have a lesser response to cohesion values. Instead of  
analyzing OTUs with significantly patchy distributions ( $p < 0.01$ ), we analyzed OTUs that showed no  
216 trend toward patchiness ( $p > 0.3$ ) that were present in fewer than 50% of samples. We fit the same  
multilevel model for these OTUs. For subject A, highly collinear random effects caused convergence  
218 problems, so we removed the random effect that allowed density dependence to vary by OTU. A full table  
of results from the six multilevel models can be found in SOM.

220

#### *Relapse in patients treated with FMT*

222 Finally, we tested whether the observed relationship between cohesion and resistance to invasion  
could be used to predict patient responses to a therapeutic microbiome intervention. We obtained data  
224 from a clinical study evaluating the role of the gut microbiome during FMT for the treatment of recurring  
*C. difficile* (Khanna et al. 2016). We downloaded the data from the Qiita portal (id 10057), again using  
226 the OTU table generated from closed reference OTU picking. As before, bacterial community  
composition data were obtained using 16S rRNA amplicon sequencing. We also contacted the original  
228 authors to ensure accurate interpretation of the metadata. FMT is a commonly used treatment for chronic  
*C. difficile* infection that has a higher success rate than antibiotic treatment (van Beurden et al. 2017).  
230 This study collected stool samples from 38 patients treated with FMT. Of these 38 patients, 29 had stool  
samples analyzed at day 28 post-FMT. The study also recorded whether patients experienced another *C.*  
232 *difficile* infection within two years after FMT. We hypothesized that patients who would later relapse  
would have lower community connectivity after FMT. To test this hypothesis, we calculated OTU  
234 connectedness values from the healthy donors, which we used to obtain cohesion values for the patients at

28 days post-FMT. The cutoffs for persistence and mean abundance of OTUs included in the cohesion  
236 calculation were 0.6 and 0.001. Because of the different variances of cohesion values among relapsing  
and cured patients, we used the non-parametric one-tailed Wilcoxon rank test for this analysis.

238

#### *Software used for analyses*

240 All analyses and simulations were conducted in R, version 3.4.0. In the metabolite exchange  
simulations, taxon metabolite requirements were generated using the *combinat* package. The packages  
242 *abind*, *data.table*, and *dplyr* were used to manipulate matrices. Linear mixed effects models were fit using  
the *lme4* package. Conditional  $R^2$  values were obtained using the *MuMIn* package. Significance values  
244 for models were obtained using the *lmerTest* package.

## 246 **Results and Discussion**

### *Simulation model*

248 Simulation results showed that the probability that an invader could persist in the community was  
strongly related to the strength of biotic interactions in the resident community. As the strength of either  
250 interaction (competition or cross-feeding) increased, standing metabolite pools decreased (Fig. 1c).  
Similarly, invaders were less successful when interactions were stronger (Fig. 1d). The two types of  
252 interactions had different mechanisms of reducing metabolites available to the invader. Stronger  
competition resulted in greater metabolite scavenging from the environment by resident taxa, thereby  
254 decreasing the probability that the invader could acquire metabolites. Conversely, cross-feeding decreased  
the amount of excreted metabolites entering the environmental pool due to direct provisioning of  
256 metabolites. Thus, stronger biotic interactions, whether originating from competition or cross-feeding,  
also led to lower rates of invasion. Our model supports the hypothesis that bacterial interactions can  
258 mediate invasion by inducing resource scarcity, thereby making it difficult for invaders to gain a foothold  
(Kinnunen et al. 2016).

260

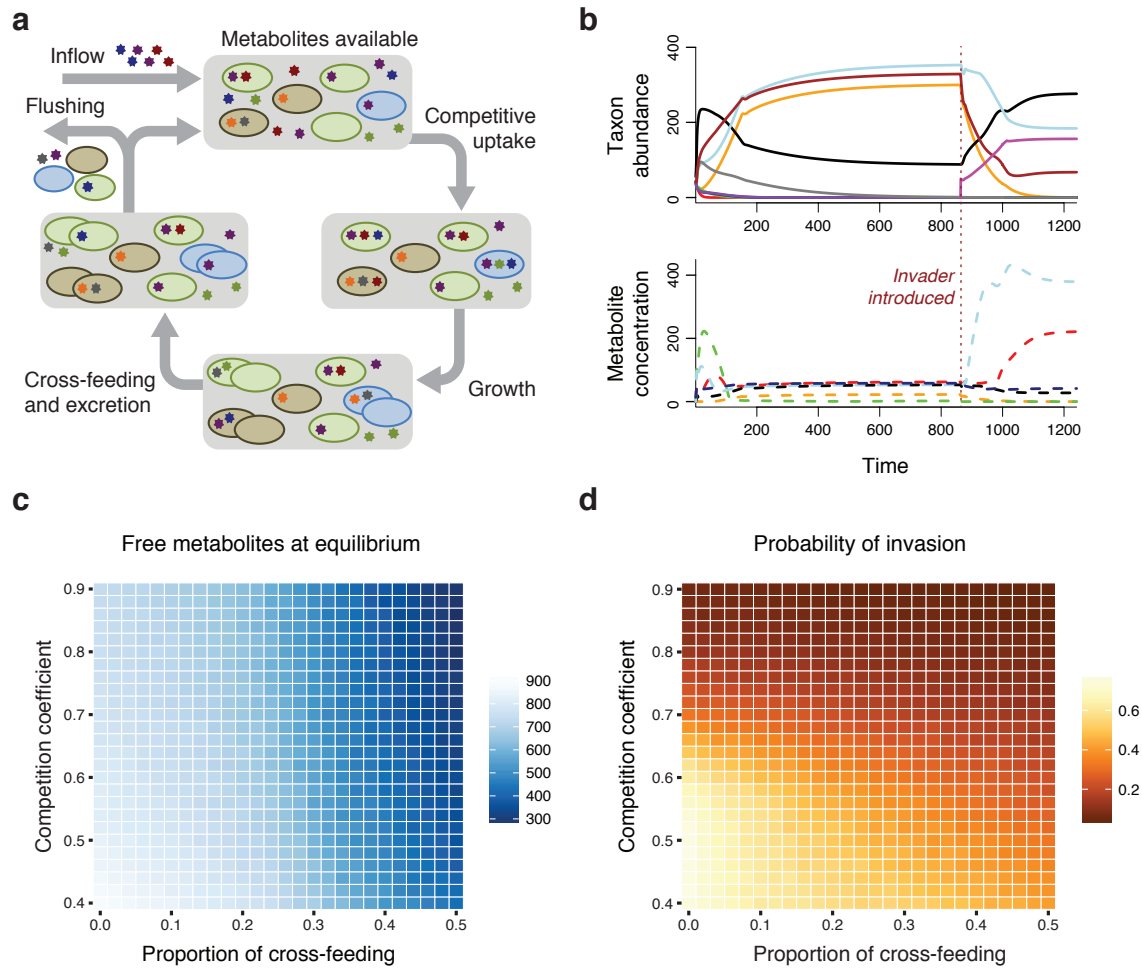

262 **Figure 1: Stronger biotic interactions lead to more complete metabolite uptake and a decreased chance of**  
264 **invasion.** a) A conceptual diagram showing the flux of metabolites during each step in the simulation model,  
266 the taxon abundances over time and the environmental metabolite concentrations over time. The red dashed line  
268 shows the time point where the invader (pink) was introduced. In this case, the invader persisted in the community.  
270 c) Environmental metabolite concentrations at model equilibrium decrease as either parameter of biotic interaction  
(proportion of cross-feeding or competition coefficient) becomes stronger. The figure shows median values of 5000  
272 runs for each parameter combination. d) The probability that an invader persisted in the community decreased when  
either parameter of biotic interaction (proportion of cross-feeding or competition coefficient) was stronger.

In the absence of cross-feeding, the model simplifies to the well-known result that only  $m$  taxa  
274 can persist on  $m$  metabolites (Tilman 1982). When cross-feeding was introduced, one taxon for every  
niche ( $m$  choose  $n$  taxa) could be present. Interestingly, this strong increase in diversity when allowing for  
276 cross-feeding is another possible explanation for the paradox of the plankton (Hutchinson 1961). The  
model has a carrying capacity determined by  $i$ ,  $n$ ,  $q$ , and  $f$ . If metabolite exchange from cross-feeding  
278 were configured such that every excreted metabolite were immediately consumed, the maximum  
community density (carrying capacity) is equal to

280

$$i \cdot \frac{(1-f)}{f} \cdot \left( \frac{1}{1-q/n} \right)$$

Eq. 3

282

#### *Dynamics of invasion in healthy subjects*

284 Next, we used our new approach for identifying invasive taxa in three long-term time series of the  
human gut microbiome. We designated taxa with significantly temporally clustered presence-absence  
286 profiles ( $p < 0.01$ ) as invasive (Fig. 2).

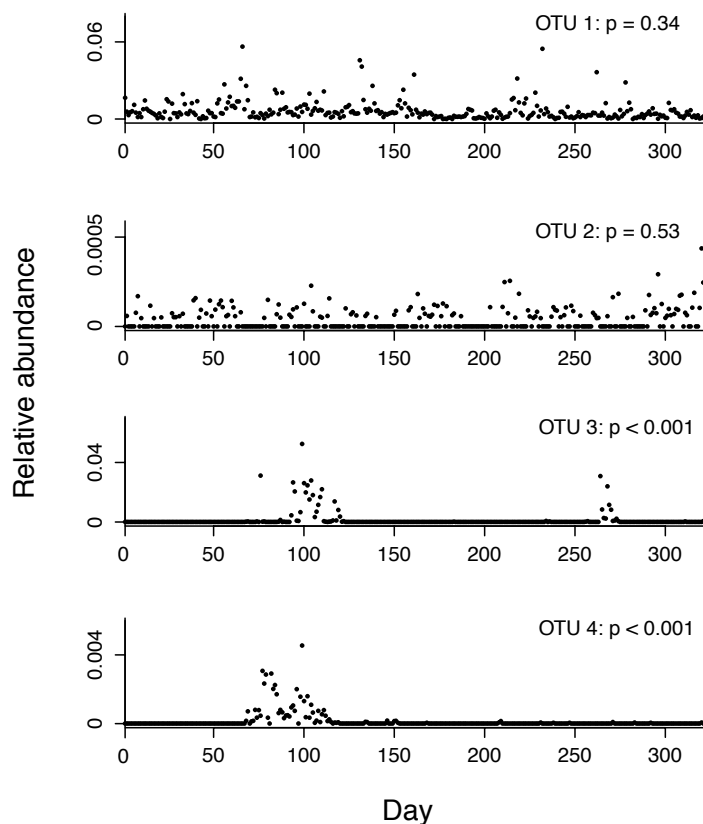

288

**Figure 2: Invasive taxa have distinct time-series signatures.** We classified each OTU as invasive or non-invasive based on its presence/absence distribution across the time series. We used a formula for quantifying the temporal clustering of presence/absence data to make this classification (Feller 1968). This formula calculates the probability of observing consecutive presences of a taxon, which we call a “streak”. The p values displayed correspond to the probability that the OTU’s longest streak would occur if presences and absences were distributed independently across the time series. Taxa showing interspersed presences and absences across the time series were categorized as not significantly clustered, and therefore non-invasive (OTU 1 and OTU 2). Taxa showing highly segregated presences and absences across the time series were categorized as significantly clustered, and therefore invasive (OTU 3 and OTU 4).

298

Invasive taxa were common in all three subjects. The total number of OTUs in each dataset was 1828 for subject A, 1771 in subject B, and 4918 in subject C. In subject A, we identified 250 invasive

300

OTUs (subject B: 441, subject C: 131) that comprised an average of 2.2% (subject B: 8.6%, subject C:  
302 2.9%) of the gut bacterial community. Although invasions were common, invader abundances were low  
and the duration of invasions were short. Median peak invader abundance was 0.053% (subject B:  
304 0.047%, subject C: 0.13%) of the community, with an interquartile range of 0.022-0.24% (subject B:  
0.022-0.15%, subject C: 0.058 – 0.32%), and median invasion duration was 7 days with an interquartile  
306 range of 4-14 days (subject B: median 8 days, IQR of 4-15 days, subject C: median 7 days and IQR of 5-  
14 days). The large number of invaders in subject B is likely explained by this subject's gastrointestinal  
308 infection during the course of the sampling period.

The multilevel models showed that cohesion values were significant predictors of abundance  
310 changes for invasive OTUs, but not for non-invasive OTUs. In all subjects, invasive OTUs declined in  
abundance when positive cohesion in the gut community was stronger (subject A:  $p < 10^{-8}$ , slope 95%  
312 confidence interval = [-8.32, -4.24]; subject B:  $p < 10^{-10}$ , CI = [-8.32, -4.59]; subject C:  $p < 10^{-5}$ , CI = [-  
12.3, -4.98]; Fig. 2). Please see SOM for full results tables. Invasive OTUs in subjects A and B showed  
314 no response to negative cohesion, while invasive OTUs in subject C declined as negative cohesion  
became stronger (subject A:  $p = 0.18$ , CI = [-2.27, 0.45]; subject B:  $p = 0.10$ , CI = [-1.72, 0.16]; subject  
316 C:  $p < 10^{-4}$ , CI = [2.28, 6.74]). Conversely, OTUs that were not classified as invasive showed no response  
to changes in cohesion in subjects A (positive:  $p = 0.11$ , CI = [-6.07, 0.70]; negative:  $p = 0.85$ , CI = [-  
318 2.56, 3.08]) and B (positive:  $p = 0.12$ , CI = [-8.92, 1.09]; negative:  $p = 0.57$ , CI = [-2.66, 4.81]), and  
showed increases in abundance in subject C (positive:  $p = 0.014$ , CI = [2.56, 24.7]; negative:  $p = 0.068$ ,  
320 CI = [-13.7, 0.63]). The range of positive cohesion values observed in communities from subject A was  
0.035 to 0.148 (subject B: 0.026 to 0.121, subject C: 0.024 – 0.114). A decrease in cohesion of 0.05 was  
322 associated with an increase of the average invader's abundance by 37% (subject B: 38%, subject C: 54%)  
(Fig. 3). The conditional  $R^2$  values for the hierarchical models of invasive taxa were 0.45 for subject A,  
324 0.61 for subject B, and 0.44 for subject C.

326

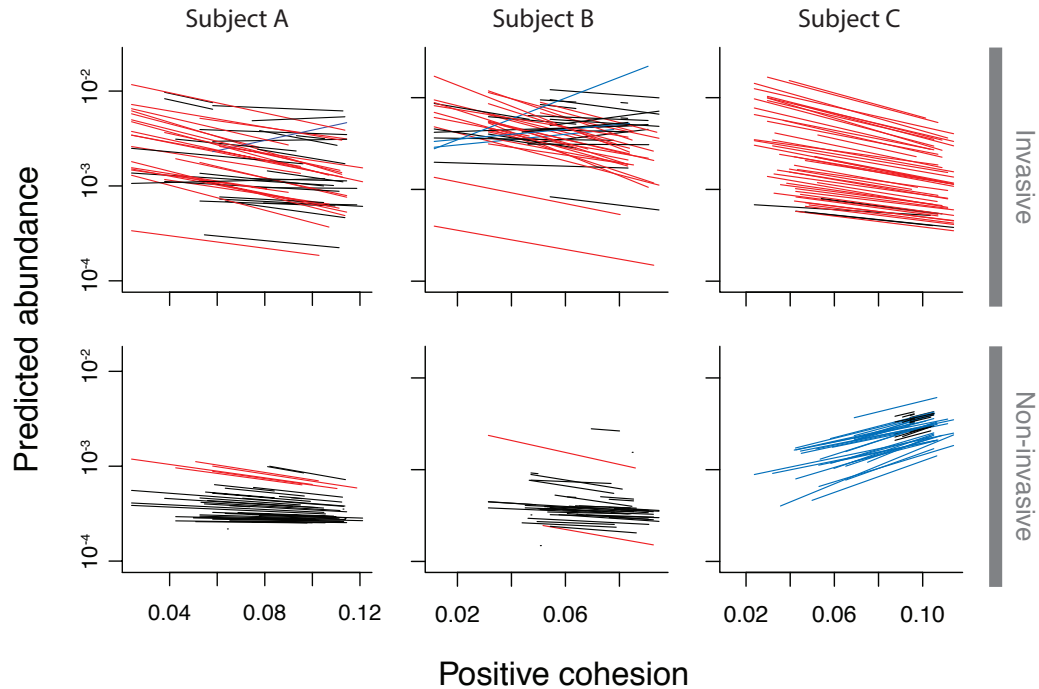

328 **Figure 3: Invasive OTUs decrease in response to stronger cohesion, whereas non-invasive OTUs do not.** Each  
panel shows the predicted abundances of the 50 most abundant taxa in each multilevel model analyzing OTU  
330 abundance as a function of cohesion. Each line indicates the predicted abundance of the OTU at time  $t + 1$  if the  
OTU were observed at a relative abundance of 0.01 at time  $t$ . Red lines indicate taxa that decreased by at least 50%  
332 over the range of observed positive cohesion values. Blue lines indicate taxa that increased by at least 50%.  
Although there was variability in how the OTUs responded to positive cohesion, invasive OTUs had a significant  
334 overall negative response to stronger positive cohesion in all three subjects (top row). For comparison, we also  
analyzed OTUs that were uncommon but non-invasive. In subjects A and B, these OTUs showed no significant  
336 response to cohesion, whereas OTUs in subject C the non-invaders increased in response to positive cohesion  
(bottom row).

338

#### *Relapse in patients treated with FMT*

340 Finally, we analyzed the data from a clinical study evaluating the role of the gut microbiome  
during FMT for the treatment of recurring *C. difficile* (Khanna et al. 2016). Stool samples were taken  
342 from patients before and after FMT, as well as from donors. We found that patients who would have a  
future relapse within 2 years after FMT had weaker gut cohesion at 28 days post-FMT than patients who



344 were cured (Fig. 4). Signed Wilcoxon rank tests were significant for both positive cohesion ( $p = 0.012$ )  
and negative cohesion ( $p = 0.015$ ). Thus, weak connectivity of the patient gut bacterial community after  
346 FMT was an indicator that the patient was more likely to relapse. Prior efforts to predict *C. difficile*  
relapse from the microbiome did not find post-FMT indicators of relapse, although connectivity was not  
348 previously considered (Pakpour et al. 2017).

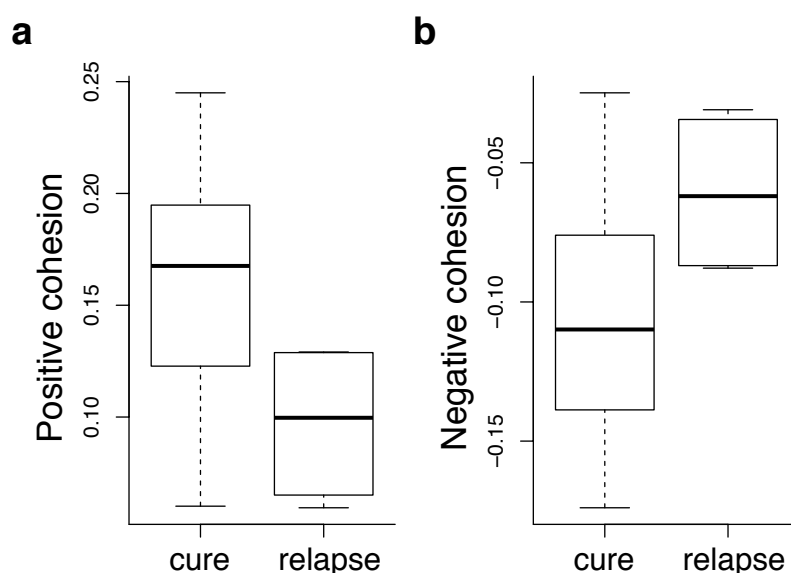

350  
**Figure 4: Resident microbiome cohesion predicts *C. difficile* relapse in patients treated with FMT.** Patients  
352 who would later experience a relapse of *C. difficile* had lower gut bacterial cohesion values at 28 days post-FMT.  
We calculated connectedness values of OTUs in healthy stool samples, which were then used to calculate cohesion  
354 values for patients after they received FMT. Relapsing patients had weaker positive cohesion (Wilcoxon signed rank  
test  $p$  value = 0.012) and weaker negative cohesion (Wilcoxon signed rank test  $p$  value = 0.015) after treatment.

356  
We conducted similar analyses using other possible predictors of relapse to evaluate the  
358 comparative explanatory power of the cohesion statistics. Other potential predictors of relapse were not  
statistically significant, including post FMT gut diversity ( $p = 0.92$  using a one-way ANOVA), Bray-  
360 Curtis dissimilarity from the donor community ( $p = 0.69$  using a one-way ANOVA), and cohesion of the  
donor community ( $p = 0.18$  for positive cohesion,  $p = 0.14$  for negative cohesion using signed Wilcoxon

362 rank tests). The small number of relapsing patients is expected, because the success rate of FMT is high.  
However, when using cohesion values as the predictor, the effect size was sufficiently large that the small  
364 sample size did not impede identifying significant separation between the cured and relapsing groups.

### 366 *Incorporating invasion into ecological models of the gut microbiome*

The three cases considered here consistently showed that stronger connectivity of the resident  
368 bacterial community led to increased colonization resistance. Agreeing with ecological invasion theory,  
most bacterial invasions were short and ultimately unsuccessful. Prior studies have hypothesized that  
370 antibiotics increase susceptibility to invaders by eliminating resident microbes (David et al. 2014,  
Schubert et al. 2015). We further suggest that the most highly connected taxa are disproportionately  
372 important to maintaining resistance against invaders, and that successful gut microbiome interventions  
(such as probiotics [Johnston et al. 2016] or dietary changes [Griffin et al. 2017]) may be attributable in  
374 part to restoring connectivity among resident gut microbes.

Interestingly, our results show predictive power independent of the role of the host immune  
376 system, which is a substantial contributor to host susceptibility to invasion (Round and Mazmanian 2009).  
Observing the responses of each invasive gut OTU (Fig. 3), it is clear that some invasive taxa had a  
378 positive or neutral response to increased gut connectivity. The variability of invader response to cohesion  
may be explained by factors not considered in this analysis. For example, it is possible that the taxa that  
380 are largely unaffected by cohesion are instead regulated by an immune response or the synthesis of  
antimicrobial compounds (Mullineaux-Sanders et al. 2018). Thus, we expect that resident community  
382 connectivity is only one of several factors affecting gut invasion. Furthermore, although the empirical  
results are consistent with the interpretation that pairwise correlations reflect biotic interactions, we  
384 cannot exclude the possibility that other factors, such as environmental forcing, contributed to cohesion  
values.

386 The mechanisms by which FMT resolves *C. difficile* infection are still poorly known (Bajaj et al.  
2017, Patron et al. 2017, Zuo et al. 2017). Indeed, when announcing the FMT National Registry, the

388 American Gastronomical Society wrote that the widespread use of FMT “has advanced the practice of gut  
microbiota manipulation in patients more rapidly than our scientific understanding” (Kelly et al. 2017).  
390 Our results indicated that FMT is more successful when post-transplant communities have many highly  
connected taxa. We therefore hypothesize that successful intervention via FMT reestablishes microbial  
392 interactions, thereby creating a microbial community that can repel invaders. Taken together, our analyses  
show that strong connectivity of the resident gut bacteria appears to be an important indicator of a  
394 resilient microbial community.

## References

- 396 Bajaj JS, Kassam Z, Fagan A, Gavis EA, Liu E, Cox IJ, *et al.* (2017). Fecal microbiota transplant from a  
rational stool donor improves hepatic encephalopathy: A randomized clinical trial. *Hepatology*  
398 **66**: 1727–1738.
- Bäumler AJ, Sperandio V. (2016). Interactions between the microbiota and pathogenic bacteria in the gut.  
400 *Nature* **535**: 85.
- Bel S, Pendse M, Wang Y, Li Y, Ruhn KA, Hassell B, *et al.* (2017). Paneth cells secrete lysozyme via  
402 secretory autophagy during bacterial infection of the intestine. *Science* eaal4677.
- Benjamin JL, Sumpter R, Levine B, Hooper LV. (2013). Intestinal Epithelial Autophagy Is Essential for  
404 Host Defense against Invasive Bacteria. *Cell Host & Microbe* **13**: 723–734.
- Berger, C. N., Sodha, S. V., Shaw, R. K., Griffin, P. M., Pink, D., Hand, P., & Frankel, G. (2010). Fresh  
406 fruit and vegetables as vehicles for the transmission of human pathogens. *Environmental  
microbiology*, *12*(9), 2385-2397.
- 408 Bosch AATM, Biesbroek G, Trzcinski K, Sanders EAM, Bogaert D. (2013). Viral and Bacterial  
Interactions in the Upper Respiratory Tract. *PLOS Pathogens* **9**: e1003057.
- 410 Caporaso JG, Lauber CL, Costello EK, Berg-Lyons D, Gonzalez A, Stombaugh J, *et al.* (2011). Moving  
pictures of the human microbiome. *Genome Biol* **12**: R50.
- 412 David LA, Materna AC, Friedman J, Campos-Baptista MI, Blackburn MC, Perrotta A, *et al.* (2014). Host  
lifestyle affects human microbiota on daily timescales. *Genome Biology* **15**: R89.
- 414 Feller, W. (1968). *An Introduction to Probability Theory and Its Applications*, Volume 1, 3rd Edition.  
New York: John Wiley & Sons.
- 416 Fey SB, Herren CM. (2014). Temperature-mediated biotic interactions influence enemy release of  
nonnative species in warming environments. *Ecology* **95**: 2246–2256.
- 418 Flores GE, Bates ST, Caporaso JG, Lauber CL, Leff JW, Knight R, *et al.* (2013). Diversity, distribution  
and sources of bacteria in residential kitchens. *Environ Microbiol* **15**: 588–596.

- 420 Foster KR, Schluter J, Coyte KZ, Rakoff-Nahoum S. (2017). The evolution of the host microbiome as an  
ecosystem on a leash. *Nature* **548**: 43.
- 422 Gillis CC, Hughes ER, Spiga L, Winter MG, Zhu W, Carvalho TF de, *et al.* (2017). Dysbiosis-Associated  
Change in Host Metabolism Generates Lactate to Support Salmonella Growth. *Cell Host &*  
424 *Microbe* **0**. e-pub ahead of print, doi: 10.1016/j.chom.2017.11.006.
- Griffin NW, Ahern PP, Cheng J, Heath AC, Ilkayeva O, Newgard CB, *et al.* (2017). Prior Dietary  
426 Practices and Connections to a Human Gut Microbial Metacommunity Alter Responses to Diet  
Interventions. *Cell Host & Microbe* **21**: 84–96.
- 428 Herren CM, McMahon KD. (2017). Cohesion: a method for quantifying the connectivity of microbial  
communities. *ISME J* **11**: 2426–2438.
- 430 Hutchinson GE. (1961). The Paradox of the Plankton. *The American Naturalist* **95**: 137–145.
- Jackson MM, Turner MG, Pearson SM, Ives AR. (2012). Seeing the forest and the trees: multilevel  
432 models reveal both species and community patterns. *Ecosphere* **3**: 1–16.
- Johnston BC, Goldenberg JZ, Parkin PC. (2016). Probiotics and the Prevention of Antibiotic-Associated  
434 Diarrhea in Infants and Children. *JAMA* **316**: 1484–1485.
- Kc R, Shukla SD, Walters EH, O’Toole RF. (2017). Temporal upregulation of host surface receptors  
436 provides a window of opportunity for bacterial adhesion and disease. *Microbiology* **163**: 421–  
430.
- 438 Kelly CR, Kim AM, Laine L, Wu GD. (2017). The AGA’s Fecal Microbiota Transplantation National  
Registry: An Important Step Toward Understanding Risks and Benefits of Microbiota  
440 Therapeutics. *Gastroenterology* **152**: 681–684.
- Khanna S, Montassier E, Schmidt B, Patel R, Knights D, Pardi DS, *et al.* (2016). Gut microbiome  
442 predictors of treatment response and recurrence in primary *Clostridium difficile* infection.  
*Aliment Pharmacol Ther* **44**: 715–727.
- 444 Kinnunen M, Dechesne A, Proctor C, Hammes F, Johnson D, Quintela-Baluja M, *et al.* (2016). A  
conceptual framework for invasion in microbial communities. *The ISME Journal* **10**: 2773.

- 446 Klitgord N, Segrè D. (2011). Ecosystems biology of microbial metabolism. *Current Opinion in Biotechnology* **22**: 541–546.
- 448 Lodge DM. (1993). Biological invasions: Lessons for ecology. *Trends in Ecology & Evolution* **8**: 133–137.
- 450 Mullineaux-Sanders C, Suez J, Elinav E, Frankel G. (2018). Sieving through gut models of colonization resistance. *Nature Microbiology* **3**: 132.
- 452 Nizet V, Ohtake T, Lauth X, Trowbridge J, Rudisill J, Dorschner RA, *et al.* (2001). Innate antimicrobial peptide protects the skin from invasive bacterial infection. *Nature* **414**: 454.
- 454 Oh J, Byrd AL, Park M, Kong HH, Segre JA. (2016). Temporal Stability of the Human Skin Microbiome. *Cell* **165**: 854–866.
- 456 Pakpour S, Bhanvadia A, Zhu R, Amarnani A, Gibbons SM, Gurry T, *et al.* (2017). Identifying predictive features of *Clostridium difficile* infection recurrence before, during, and after primary antibiotic treatment. *Microbiome* **5**: 148.
- 458 Pande S, Shitut S, Freund L, Westermann M, Bertels F, Colesie C, *et al.* (2015). Metabolic cross-feeding via intercellular nanotubes among bacteria. *Nature Communications* **6**: 6238.
- 460 Pathak DT, Wei X, Bucuvalas A, Haft DH, Gerloff DL, Wall D. (2012). Cell Contact–Dependent Outer Membrane Exchange in Myxobacteria: Genetic Determinants and Mechanism. *PLOS Genetics* **8**: e1002626.
- 462 Patron RL, Hartmann CA, Allen S, Griesbach CL, Kosiorek HE, DiBaise JK, *et al.* (2017). Vancomycin Taper and Risk of Failure of Fecal Microbiota Transplantation in Patients With Recurrent *Clostridium difficile* Infection. *Clin Infect Dis* **65**: 1214–1217.
- 464 Round JL, Mazmanian SK. (2009). The gut microbiota shapes intestinal immune responses during health and disease. *Nature Reviews Immunology* **9**: 313.
- 468 Sakai, AK, Allendorf FW, Holt JS, Lodge DM, Molofsky J, With KA, *et al.* (2001). The Population Biology of Invasive Species. *Annual Review of Ecology and Systematics* **32**: 305–332.
- 470

- Schubert AM, Sinani H, Schloss PD. (2015). Antibiotic-Induced Alterations of the Murine Gut  
472 Microbiota and Subsequent Effects on Colonization Resistance against *Clostridium difficile*.  
*mBio* **6**: e00974-15.
- 474 Tilman D. (1982). Resource Competition and Community Structure. Princeton University Press.  
Williamson M. (2006). Explaining and predicting the success of invading species at different stages of  
476 invasion. *Biol Invasions* **8**: 1561–1568.
- Yvette H. van Beurden, Max Nieuwdorp, Pablo J. E. J. van de Berg, Chris J. J. Mulder, Abraham  
478 Goorhuis. (2017). Current challenges in the treatment of severe *Clostridium difficile* infection:  
early treatment potential of fecal microbiota transplantation. *Therap Adv Gastroenterol* **10**: 373–  
480 381.
- Zuo T, Wong SH, Lam K, Lui R, Cheung K, Tang W, *et al.* (2017). Bacteriophage transfer during faecal  
482 microbiota transplantation in *Clostridium difficile* infection is associated with treatment outcome.  
*Gut* [gutjnl-2017-313952](https://doi.org/10.1136/gutjnl-2017-313952).
- 484
